# Supplementary material
Source: Research Square preprint supplement (doi:10.21203/rs.3.rs-8725888/v1)
Supplement: Supplementary file 1 [file 90e70a65a65d6b1be1b1a35b.docx]

**Supplementary Materials**

Inclusion/Exclusion Criteria

Shotgun Metagenomics

MRI Acquisition, Preprocessing, and Analysis

Supplemental Table 1: Group differences in neural activity by task

sPLS-DA Analysis

Random Forest Methods and Results (Supplemental Figure 1)

Description of Behavioral Measures

Supplemental Figure 2: Phylogeny of the included OGUs

Supplemental Table 2: List of 24 tryptophan-related genera

Supplemental Table 3: Descriptive statistics and group differences in demographics and behavioral variables

Supplemental Table 4: Tryptophan-related OGU associations with behavior in NT

Supplemental Table 5: Tryptophan-related OGU associations with tasked based ROIs in the NT group

Exploratory Sensory Processing Task (Supplemental Figure 3)

Supplemental Table 6: Group differences in neural activity for the vicarious touch task

Supplemental Table 7: Significant OGU associations with tasked based ROIs for the vicarious touch task in ASD

Supplemental Table 8: Significant association between the R MCC and ADOS RRBs for the vicarious touch task

Supplemental Table 9: Tryptophan-related OGU associations with vicarious touch ROIs in the NT group

**Inclusion/Exclusion Criteria**

All participants met the following inclusion criteria: (i) aged 8-17 years old; (ii) IQ≥79 on either Full-Scale Intelligence Quotient (FSIQ), or Verbal Comprehension Index (VCI) of the Wechsler Abbreviated Scale of Intelligence 2nd edition (WASI-II)1 and (iii) right-handed.2 The Autism Diagnostic Observation Schedule (ADOS-2)3 and the Autism Diagnostic Interview-Revised (ADI-R)4 were administered by a research-certified staff member to confirm ASD diagnosis for children in the ASD group. All NT participants met the following additional inclusion criteria: (i) no first-degree relatives diagnosed with ASD; (ii) no concerns for attention-deficit/hyperactivity disorder, (t- score<65 on the Conners-3AI5); (iii) low likelihood of ASD (t-score<60 on the Social Responsiveness Scale, 2nd edition [SRS-26]; and (iv) no diagnosed psychological or neurological disorders.

Participants were excluded if they met any of the following criteria: (i) a history of head injury with loss of consciousness greater than 5 min; (ii) limited English proficiency (child or parent/legal guardian); (iii) born before 36 weeks of gestation; (iv) contraindications to participating in MRI (i.e. metal implants, braces, inability to remain still for at least 1 hour); (v) consumed probiotics within two weeks or antibiotics within 30 days prior to participation.

**Shotgun Metagenomics**

DNA was extracted from stool samples using the MagMAX Microbiome Ultra Total Nucleic Acid Isolation Kit following Earth Microbiome Project protocols.7 Extracted genomic DNA was quantified using Quant-iT PicoGreen dsDNA Assay Kit. A total of 5 ng (or 3.5 µL maximum) of DNA underwent library preparation using a miniaturized KAPA HyperPlus Kit (1:10 ratio) with a 15-cycle PCR amplification using an iTru indexing strategy. Libraries were quantified (PicoGreen), pooled to equal volume, PCR cleaned (Qiagen QIAquick PCR Purification Kit), and size selected (Sage Science Pippin HT) targeting 300-700bp fragments. The resulting pool was run on an Agilent 4200 Tapestation for quality control and sequenced on an Illumina iSeq100 platform. Using total read counts obtained from the iSeq100, normalized pooling values were calculated on a per-sample basis to achieve an even sequencing distribution. The libraries were re-pooled, PCR cleaned, size selected (300-700bp) and run on an Agilent 4200 Tapestation for QC. The resulting libraries underwent paired-end sequencing (2 × 150 bp) on an Illumina NovaSeq 6000 platform at the Institute for Genomic Medicine (IGM) Genomics Center, University of California San Diego.

Following high-throughput DNA sequencing, sequencing demultiplexing, and FASTQ generation, data was uploaded to and processed via Qiita8. High-stringency computational host read removal was performed as previously described.9 Briefly, quality filtering, adapter removal, and read trimming was performed using fastp10 (v. 0.20.1), then human reads were removed using minimap211 (v. 2.28) via consecutive alignment to human reference genomes GRCh38.p14 and T2T-CHM13v2.0. Next, a pangenome index was created using the 94 currently available human reference genomes from the Human Pangenome Reference Consortium12 using Movi13 (v. 1.0) and reads with high-propensity pseudo-matching lengths to the human pangenome index were discarded. Remaining reads were aligned to the microbial reference database Web of Life14 (release 2) using Bowtie215 (v. 2.5.0) using the parameters from the SHOGUN pipeline.16 The resulting OGU tables were converted to BIOM format,17 subject to 30% feature prevalence filtration, center log-ratio transformed, and filtered against Greengenes2 (v. 2024.09)18

**MRI**

*MRI Acquisition*

A 3-Tesla MAGNETOM Prisma scanner at the Dornsife Cognitive Imaging Center equipped with a 20-channel head coil was used for MRI acquisition. A structural T1-weighted scan using a T1-weighted MPRAGE protocol was obtained for each participant (TR = 1950 ms, TE = 3.09 ms, flip angle = 10°, 256 × 256 matrix, 176 sagittal slices, 1 mm isotropic resolution). Parameters for the functional scans consisted of an echo-planar imaging (EPI; 150 whole-brain volumes) with the following: TR = 2 s, TE = 30 ms, flip angle = 90°, 64 × 64 matrix, in-plane resolution 2.5 × 2.5 mm, and 41 transverse slices, each 2.5 mm thick, covering the whole-brain with a multiband factor of three. Spin Echo EPI field mapping data were acquired in both AP and PA directions, maintaining the same geometry as the EPI data, to enable EPI off-resonance distortion correction. Imaging parameters included TR = 1,020 ms, TE1 = 10 ms, TE2 = 12.46 ms, flip angle = 90°, FOV = 224 × 224 × 191 mm3, and an isotropic voxel size of 2.5 mm.

*fMRI Task Details*

Face and Action Observation: This block designed fMRI task was presented in a single 9-minute run. Videos depicted seven different male and female Caucasian adult actors who were filmed making the emotional facial expressions (e.g., happy facial expression), non-emotional facial expressions (e.g., puffed cheek), and bimanual hand action videos (e.g., playing a xylophone; EmStim database).60 Each video was presented for 3.75 seconds followed by a black screen for 1.25 seconds in a blocked design followed by a 15 second rest block (black crosshair in the middle of a white screen). There were 3 videos per block and five blocks of each stimulus condition, which were alternated with rest in a pseudo-random sequence.60

Disgust Processing: The neutral and disgusted facial expressions were selected from the NimStim online repository19 and EmStim database and utilized in a single 10-minute block-designed run.60 Eighteen images were used from each stimulus category (disgusting foods, neutral foods, disgusting facial expressions, neutral facial expressions). There were six-15 second blocks per stimulus category and a 250 ms fixation crosshair was presented between each stimulus, totalling 24 blocks (5 per category).61

*MRI Preprocessing*

Preprocessing steps included: brain extraction and non-brain tissue removal using BET (Smith 2002), motion correction using MCFLIRT, B0 unwarping along the y-axis, spatial smoothing was applied using a Gaussian kernel of 5mm full-width at half-maximum (FWHM), high-pass temporal filtering with a 100-sec cut-off, and independent components analysis (ICA; Jenkinson et al., 2002). The preprocessed data were then processed using the ICA- AROMA algorithm, which removed noise and motion-related components from the whole brain signal (Prium et al., 2015). Finally, registration to the MNI-152 standard atlas was performed using a 12-degree-of-freedom affine transformation, followed by FNIRT nonlinear registration (Jenkinson 2002; Jenkinson 2001). Regressors included the following conditions across tasks: face and action observation task: emotional facial expressions>rest, non-emotional facial expressions>rest, all facial expressions (emotional and nonemotional)>rest, hand actions>rest, and all stimuli>rest; disgust processing: disgusting foods>rest and disgusted facial expressions>rest.

*MRI Analysis*

Subject-specific head motion parameters were used as nuisance regressors and the stimulus conditions were modeled for each participant as separate regressors. For the face and action observation task, regressors included emotional faces, non-emotional faces, and hand actions. For disgust processing, regressors included disgusting foods and disgusted facial expressions. Higher level mixed-effects analysis with FSL’s Flame 1 algorithm was used to perform between-group analysis with age, sex, and IQ as covariates. A threshold of Z>3.1, cluster size probability correction threshold of *p*<0.05, and a small volume correction threshold of *p*<0.01 was performed for apriori regions of interest (ROIs). Structural ROIs from the Harvard-Oxford atlas thresholded at 30% probability, were then applied to ensure anatomical overlap.

**Supplemental Table 1: Group differences in neural activity by task**

| **Task** | **Condition** | **Contrast** | **Laterality** | **ROI** | **X** | **Y** | **Z** | **Max Z** |
| --- | --- | --- | --- | --- | --- | --- | --- | --- |
| Face and Action Observation (N=104) | All stimuli>Rest | NT>ASD | R | IFGop | 42 | 20 | 18 | 3.51 |
|  |  | NT>ASD | R | MCC | 6 | 6 | 38 | 2.94 |
| Disgust Processing (N=50) | Disgusted Faces>Rest | ASD>NT | R | vAI | 42 | 18 | -10 | 3.65 |
|  |  | ASD>NT | - | pACC | 0 | 40 | 22 | 3.96 |
|  |  | ASD>NT | L | dAI | -30 | 16 | 6 | 3.15 |
|  |  | NT>ASD | R | FFA | 36 | -56 | -20 | 3.05 |
|  | Disgusting Foods> Rest | NT>ASD | R | MI | 42 | -1 | -10 | 3.41 |
|  |  | NT>ASD | L | vAI | -34 | 11 | -12 | 2.86 |

Note. ROI: Region of Interest; L: Left; R: Right; IFGop: inferior gyrus pars opercularis; MCC: mid-cingulate cortex; vAI: ventral anterior insula; pACC: pregenual anterior cingulate cortex; dA: dorsal anterior; FFA: fusiform face area; MI: mid-insula

**sPLS-DA Parameters**

 The model was tuned for the optimal number of components and OGUs per component using 10-fold cross validation repeated 50 times, and minimized the balanced error rate (BER), the average proportion of wrongly classified samples in each class. The model selected as best fitting was the model where the reduction in BER was <3% with addition of more features. The scores for each participant on each component/signature were plotted in two-dimensional space to visualize the discrimination in sample plots. Welch’s two sample t-test was used to quantify the group differences on scores on the derived signature and effect size differences between groups on the signature were computed using Cohen’s d. Ten-fold cross-validation repeated 100 times was used to evaluate the PLS-DA classification performance (BER using Mahalanobis distance) and Area Under the Curve (AUC).

**Random Forest**

***Methods***

To capture complex, nonlinear relationships and non-linear interactions between the microbial features discriminating ASD from NT, we applied random forest classification on the OGU level data. Random forest is a nonlinear ensemble learning method that combines multiple decision trees trained on a subset of the data and features. Feature importance in predicting diagnosis was determined using mean decrease Gini index, where higher values reflect greater importance for a model’s predictive accuracy. The model was configured to generate 1000 random trees, each considering at least 37 variables at each split. The results were summarized using mean values and 95% confidence intervals using bootstrapping.

***Results***

The random forest classifier contained 15 features and had an accuracy of 56.56% (AUC=0.55). Five of the selected OGUs (*Streptococcus mitis_AR, Streptococcus anginosus, Streptococcus intermedius, Clostridium_AP scindens, Blautia_A hydrogenotrophica*) overlapped with the sPLS-DA metagenomic signature (Supplemental Figure 1).

**Supplemental Figure 1: Random Forest Results**


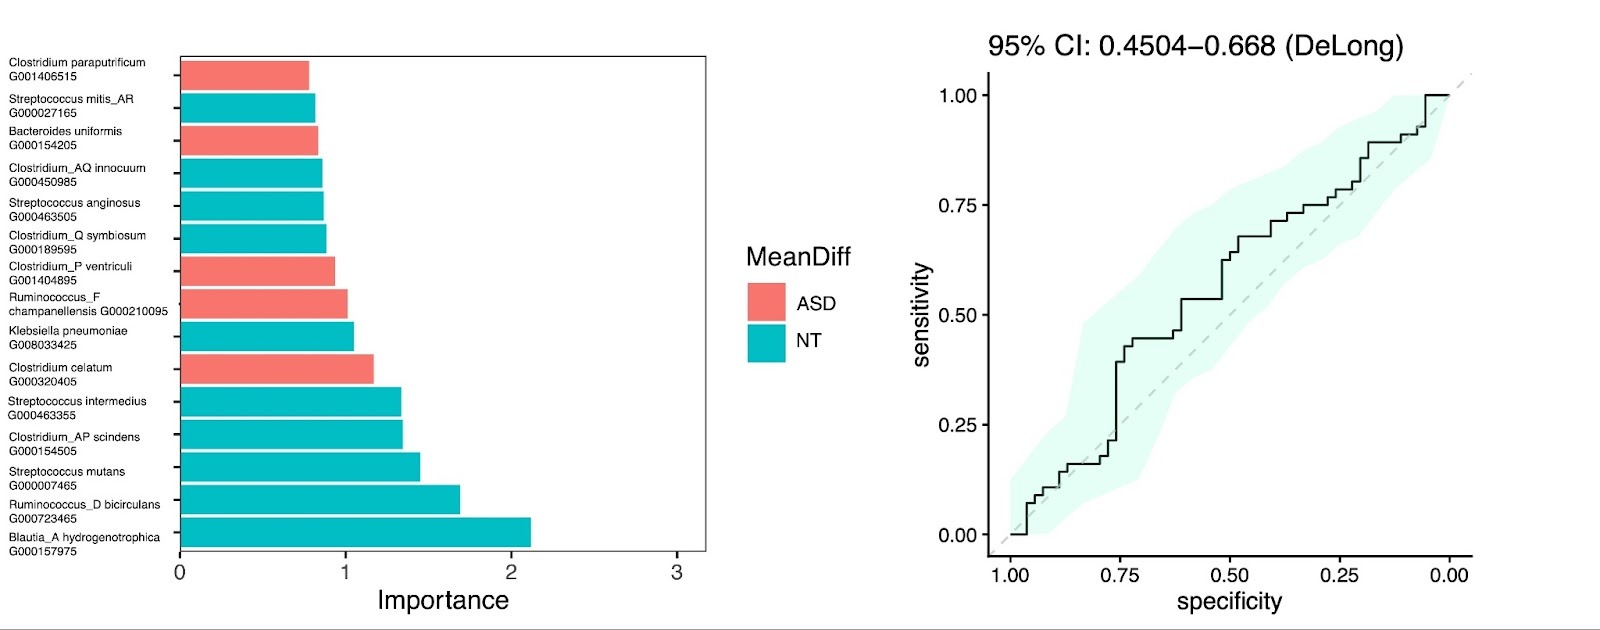


**Description of Behavioral Measures**

  Study data were collected and managed using REDCap electronic data capture tools hosted at the University of Southern California.20,21

Autism Diagnostic Observation Schedule-2 (ADOS-2)3: The ADOS-2 is the gold-standard diagnostic tool for ASD. The ADOS-2 module 3 (verbally fluent children and young adolescents) or module 4 (verbally fluent older adolescents) was administered to all children in the ASD group by a trained research staff to verify diagnosis. The revised scoring algorithm for module 4 was utilized to yield comparable scores across modules.22

Autism Diagnostic Interview-Revised (ADI-R)4: The ADI-R is a structured 90-150 minute parent interview to assess autism in children ages 2 and older. It has three domains: language/communication, reciprocal social interaction, and restricted, repetitive, and stereotyped behaviors (RRBs). The ADI-R interview was conducted by trained research staff with parents of children in the ASD group to verify diagnosis.

Adolescent Sleep Wake Scale (ASWS)23: Self-reported sleep quality was assessed using the ASWS. The ASWS has 28-items and assesses sleep quality across 5 domains – going to bed, falling asleep, maintaining sleep, reinitiating sleep, and returning to wakefulness with acceptable to good internal consistency.24

Alexithymia Questionnaire for Children (AQC)25: The AQC is a 20-item self-reported alexithymia measure with three domains – difficulty describing feelings, difficulty identifying feelings, and externally oriented thinking. The difficulty describing feelings, difficulty identifying feelings have high internal consistencies and were combined to calculate a 2-factor total score.26,27

Diet:  As there are inherent issues with recording children’s diet (i.e. recall bias, issues with calculating accurate portion sizes),28 we asked parents to report the type of diet that best reflects what their child consumes on a regular basis. Options were: standard American, modified American, Mediterranean, paleo, vegetarian, gluten free, dairy free, and other. The standard American and modified American diets were grouped into the category “Modified Standard American” which included whole grains (pasta and bread), red meat, some processed foods, poultry, fish, eggs and dairy, and vegetables and fruits and the other category included Mediterranean, vegetarian, paleo, gluten free, dairy free, and other diets.

Disgust Propensity and Sensitivity Scale-Revised (DPSS-R)29: The DPSS-R is a 15-item self-reported measure of disgust propensity, the frequency of disgust experiences and disgust sensitivity, the emotional impact of disgusting stimuli. The DPSS-R has high internal consistency and test-retest reliability.30

Gastrointestinal Symptom Rating Scale (GSRS)31: Gastrointestinal symptoms were assessed with the GSRS, a 15-item self-reported measure with high interrater reliability. It has been used in prior studies on children with ASD.32,33

Screen for Child Anxiety Related Emotional Disorders, Child Version (SCARED-C)34: The SCARED-C is a 41-item self-reported questionnaire to assess anxiety symptoms in children and adolescents. It has 5 subscales – panic disorder or significant somatic complaints, generalized anxiety disorder, separation anxiety disorder, social anxiety disorder, and significant school avoidance. The subscores were combined to obtain a total score, which was used in this study. The SCARED-C has strong test-retest reliability and adequate external validity with clinician rated anxiety.35

Sensory Experiences Questionnaire 3.0 (SEQ)36: The SEQ is a 105-item parent reported measure of sensory response patterns, sensory stimuli, and sensory contexts. The SEQ has strong, significant factor loadings for each domain.37 The hypersensitivity and hyposensitivity response patterns were used in this study due to their high prevalence in children with ASD and prior links with neural activity38 and the gut microbiome.39

Social Responsiveness Scale, 2nd edition (SRS-2)6: The SRS-2 is a 65-item parent reported measure for autistic symptoms for children and adolescents aged 4-18. It was used as eligibility criteria for the NT group (T-score<60) and a measure of ASD severity in the ASD group. The T-score was used in the data analysis.

Wechsler Abbreviated Scale of Intelligence (WASI-II)1: The WASI-II is a standardized measure of intelligence that has four subtests including block design, vocabulary, matrix reasoning and similarities. A full-scale intelligence quotient (FSIQ) score was obtained by combining age-normalized scores on all 4 subtests. The WASI was administered on the first visit by trained research staff. The FSIQ score was used as a screener for eligibility and as a covariate in all analyses.

**Supplemental Figure 2: Phylogeny of the 96 included OGUs**


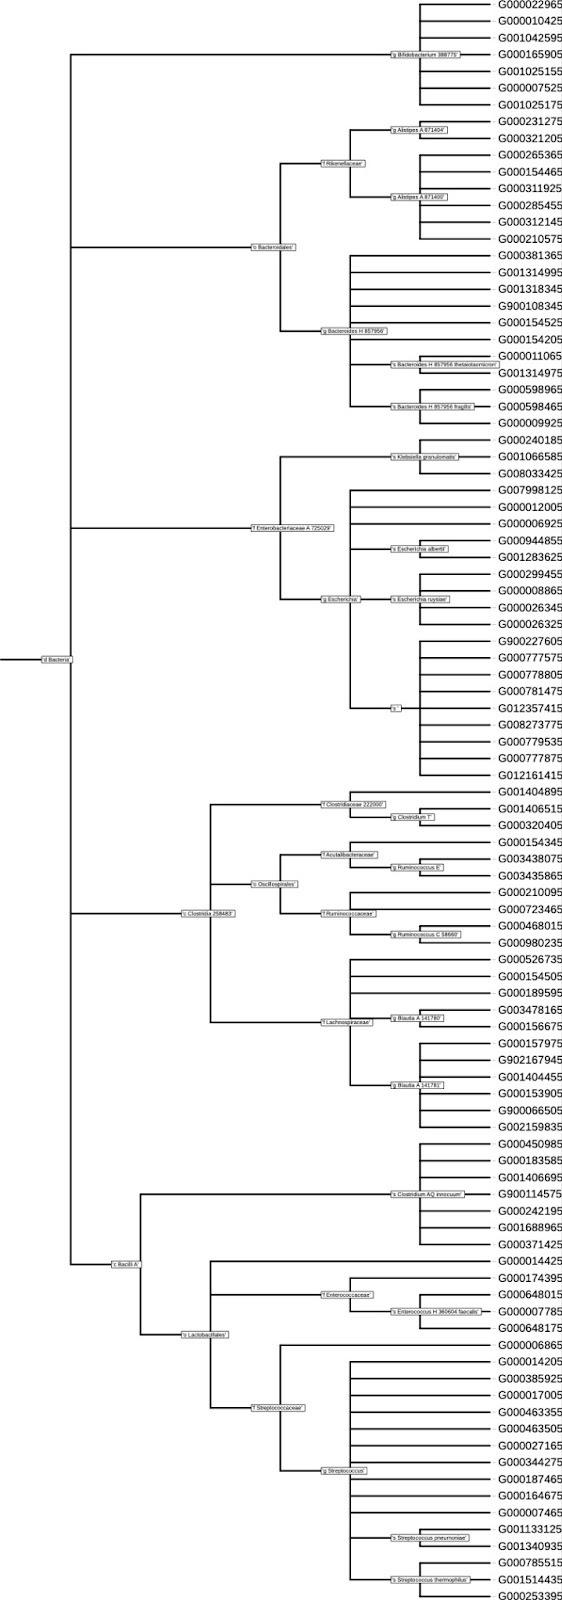


**Supplemental Table 2: List of 24 tryptophan-related genera included in the analyses**

| Genus |
| --- |
| Alistipes_A_871400 |
| Alistipes_A_871404 |
| Bacteroides_H |
| Bifidobacterium_388775 |
| Blautia_A_141780 |
| Blautia_A_141781 |
| Clostridium_A |
| Clostridium_AP |
| Clostridium_AQ |
| Clostridium_P |
| Clostridium_Q_134516 |
| Clostridium_T |
| Enterococcus_B |
| Enterococcus_H_360604 |
| Escherichia_710834 |
| Klebsiella_724518 |
| Lactobacillus |
| Lactococcus_A_346120 |
| Ruminococcus_B |
| Ruminococcus_C_58660 |
| Ruminococcus_D |
| Ruminococcus_E |
| Ruminococcus_F |
| Streptococcus |

**Supplemental Table 3: Descriptive statistics and group differences in demographics and behavioral variables**

|  | ASD (N=53) | | | NT (N=53) | | |  |  |
| --- | --- | --- | --- | --- | --- | --- | --- | --- |
| Variable | N | # Yes | % | N | Y | % | p | Cramer's V |
| Sex (Male) | 53 | 42 | 79% | 53 | 30 | 57% | 0.021 | -0.243 |
| Antibiotic usage- Infant | 48 | 21 | 44% | 50 | 14 | 28% | 0.21 | 0.173 |
| Prenatal antibiotic usage | 48 | 8 | 17% | 51 | 2 | 4% | 0.055 | 0.234 |
| Breastfed | 47 | 44 | 94% | 48 | 46 | 96% | 0.711 | 0.106 |
| Birth mode (C- Section) | 48 | 16 | 33% | 51 | 19 | 38% | 0.5 | 0.121 |
| Diet Type (Modified Std. American) | 53 | 39 | 74% | 53 | 28 | 53% | 0.043 | 0.215 |
| Maternal illness while pregnant | 40 | 12 | 30% | 41 | 4 | 10% | 0.027 | 0.213 |
| Variable | N | M | SD | N | M | SD | p | Cohen's d |
| Age | 53 | 12.05 | 2.31 | 53 | 11.82 | 2.25 | 0.605 | 0.101 |
| FSIQ | 53 | 106.55 | 17.57 | 53 | 118.21 | 13.72 | <0.001 | -0.74 |
| BMI | 52 | 20.95 | 5.43 | 53 | 18.28 | 2.94 | 0.002 | 0.615 |
| ADOS Social Affect | 52 | 9.42 | 3.43 | N/A | N/A | N/A | N/A | N/A |
| ADOS RRBs | 52 | 2.46 | 1.34 | N/A | N/A | N/A | N/A | N/A |
| ADOS Total | 52 | 11.88 | 3.66 | N/A | N/A | N/A | N/A | N/A |
| ADI-R RSI | 48 | 18.21 | 6.97 | N/A | N/A | N/A | N/A | N/A |
| ADI-R RRBs | 48 | 6.81 | 2.92 | N/A | N/A | N/A | N/A | N/A |
| GSRS Total | 40 | 27 | 10.67 | 41 | 20.24 | 3.96 | <0.001 | 0.844 |
| ASWS Total | 26 | 3.89 | 0.71 | 29 | 4.39 | 0.69 | 0.011 | -0.712 |
| SRS-2 T-Score | 53 | 73.89 | 9.67 | 53 | 44.96 | 4.88 | <0.001 | 3.777 |
| SEQ Hyposensitivity (raw score) | 24 | 32.5 | 9.14 | 26 | 20.77 | 2.37 | <0.001 | 1.79 |
| SEQ Hypersensitivity (raw score) | 24 | 77.46 | 21.03 | 26 | 42.42 | 7.76 | <0.001 | 2.246 |
| SCARED-C Total | 51 | 27.37 | 14.4 | 49 | 19.98 | 13.54 | 0.01 | 0.529 |
| DPSS-R Disgust Propensity | 24 | 24.96 | 7.54 | 23 | 21.22 | 4.34 | 0.044 | 0.605 |
| DPSS-R Disgust Sensitivity | 24 | 14.33 | 6.48 | 23 | 10.52 | 3.57 | 0.017 | 0.725 |
| AQC- 2 factor total | 53 | 9.62 | 4.85 | 53 | 6.85 | 4.7 | 0.003 | 0.581 |

Note. N: number of participants; M: mean; FSIQ: Full scale intelligence quotient; BMI: Body Mass Index; ADOS: Autism Diagnostic Observation Schedule; RRBs: Restricted and Repetitive Behaviors; ADI-R: Autism Diagnostic Interview- Revised; RSI: Reciprocal Social Interaction; GSRS: Gastrointestinal Symptom Rating Scale; ASWS: Adolescent Sleep Wake Scale; SRS: Social Responsiveness Scale, 2nd Edition; SEQ: Sensory Experiences Questionnaire; SRS-2: Social Responsiveness Scale, 2nd edition; SCARED-C: Screen for Child Anxiety Related Emotional Disorders; DPSS-R: Disgust Propensity and Sensitivity Scale-Revised; AQC: Alexithymia Questionnaire for Children; Y: Yes

**Supplemental Table 4: Tryptophan-related OGU associations with behavior in NT**

| **Species** | **OGU** | **Behavior** | **β** | **SE** | **Std β** | **p** | **q** |
| --- | --- | --- | --- | --- | --- | --- | --- |
| Bifidobacterium adolescentis | G000010425 | SRS-2 T-Score | -0.342 | 0.077 | -0.542 | 0.0001 | 0.005 |
| G001025155 | SRS-2 T-Score | -0.238 | 0.060 | -0.505 | 0.0002 | 0.012 |
| G000165905 | SRS-2 T-Score | -0.257 | 0.073 | -0.464 | 0.001 | 0.029 |
| G000007525 | SRS-2 T-Score | -0.282 | 0.085 | -0.444 | 0.002 | 0.043 |
| G001025175 | SRS-2 T-Score | -0.219 | 0.074 | -0.402 | 0.005 | 0.090 |

Note. β: unstandardized Beta; SE: Standardized Error, Std β: Standardized Beta; p: p-value, q= FDR adjusted p-value; SRS-2: Social Responsiveness Scale, 2nd Edition

**Supplemental Table 5: Tryptophan-related OGU associations with tasked based ROIs in the NT group**

| **Disgust Processing** | | | | | | | | |
| --- | --- | --- | --- | --- | --- | --- | --- | --- |
| Species | OGUID | ROI | Stimuli | β | Std β | SE | p | q |
| Clostridium_AQ innocuum | G000450985 | R FFA | Disgusted Faces | 0.724 | 0.671 | 0.177 | 0.001 | 0.004 |
| Enterococcus_B faecium | G000174395 | R Mid-Insula | Disgusting Foods | -0.133 | -0.633 | 0.039 | 0.003 | 0.019 |
| Bacteroides_H fragilis | G000598965 | L dA Insula | Disgusted Faces | -0.108 | -0.741 | 0.035 | 0.006 | 0.036 |
| Bacteroides_H fragilis | G000598465 | L dA Insula | Disgusted Faces | -0.099 | -0.742 | 0.032 | 0.006 | 0.037 |
| Bacteroides_H fragilis | G000009925 | L dA Insula | Disgusted Faces | -0.124 | -0.728 | 0.041 | 0.007 | 0.043 |
| Blautia_A_141780 sp001304935 | G003478165 | R FFA | Disgusted Faces | 0.561 | 0.596 | 0.197 | 0.011 | 0.063 |
| Clostridium_AQ innocuum | G001688965 | R FFA | Disgusted Faces | 0.591 | 0.590 | 0.207 | 0.011 | 0.063 |
| Streptococcus anginosus | G000463505 | pACC | Disgusted Faces | 0.120 | 0.559 | 0.043 | 0.012 | 0.070 |
| Bifidobacterium animalis | G000022965 | R FFA | Disgusted Faces | 0.242 | 0.624 | 0.087 | 0.012 | 0.074 |

Note. OGU: Operational Genomic Unit; ROI: Region of Interest; β: unstandardized beta; SE: Standardized Error; Std β: Standardized Beta; p: p-value, q= FDR adjusted p-value; L: Left; R: Right; FFA: fusiform face area; MCC: mid-cingulate cortex; dA: dorsal anterior; pACC: pregenual anterior cingulate cortex;aMCC/dmPFC: anterior mid-cingulate cortex/dorsomedial prefrontal cortex; S1: primary somatosensory cortex; p: posterior

**Exploratory Sensory Processing Task**

As part of this project, we additionally piloted a study on relationships between gut microbes and brain activity during vicarious somatosensory processing.

***Methods***

Vicarious touch (ASD=19, NT=20): We originally designed a task in which participants would experience physical touch in the scanner, however due to the COVID-19 pandemic we were required to maintain a 6-foot distance from participants and thus we adapted the task into a vicarious touch task. As we needed to adjust this task, it had the lowest participant enrollment, and thus we are reporting it as pilot data here.

Participants viewed a series of four different videos of a person in an MRI scanner with their arm being stroked by a gloved hand (social touch) or a dry sponge attached to a wooden rod (non-social touch), or a gloved hand or dry sponge attached to a wooden rod hovering over their arm (control conditions) during a for 10-minutes fMRI run. Videos were presented in a block design, each block was 15 seconds long followed by a 15 second rest block (black crosshair in the middle of a white screen). For each condition, there were five blocks. As we needed to adjust this task due to the COVID-19 restrictions, this task had the lowest participant enrollment, and thus we are reporting it as exploratory results here. Refer to Supplemental Figure 3 for the still images from the vicarious touch task.

For the vicarious touch task, we followed the same analysis protocol as the main text except a threshold of Z>2.3 and cluster size probability correction threshold of *p*<0.05 was utilized for the vicarious touch task due to task changes that may have limited signal (observation of touch vs actual touch) as a result of the COVID-19 pandemic restrictions. Regressors included vicarious touch: social touch>rest and non-social touch>rest.

Supplemental Figure 3: Screenshots of stimuli from the vicarious touch task


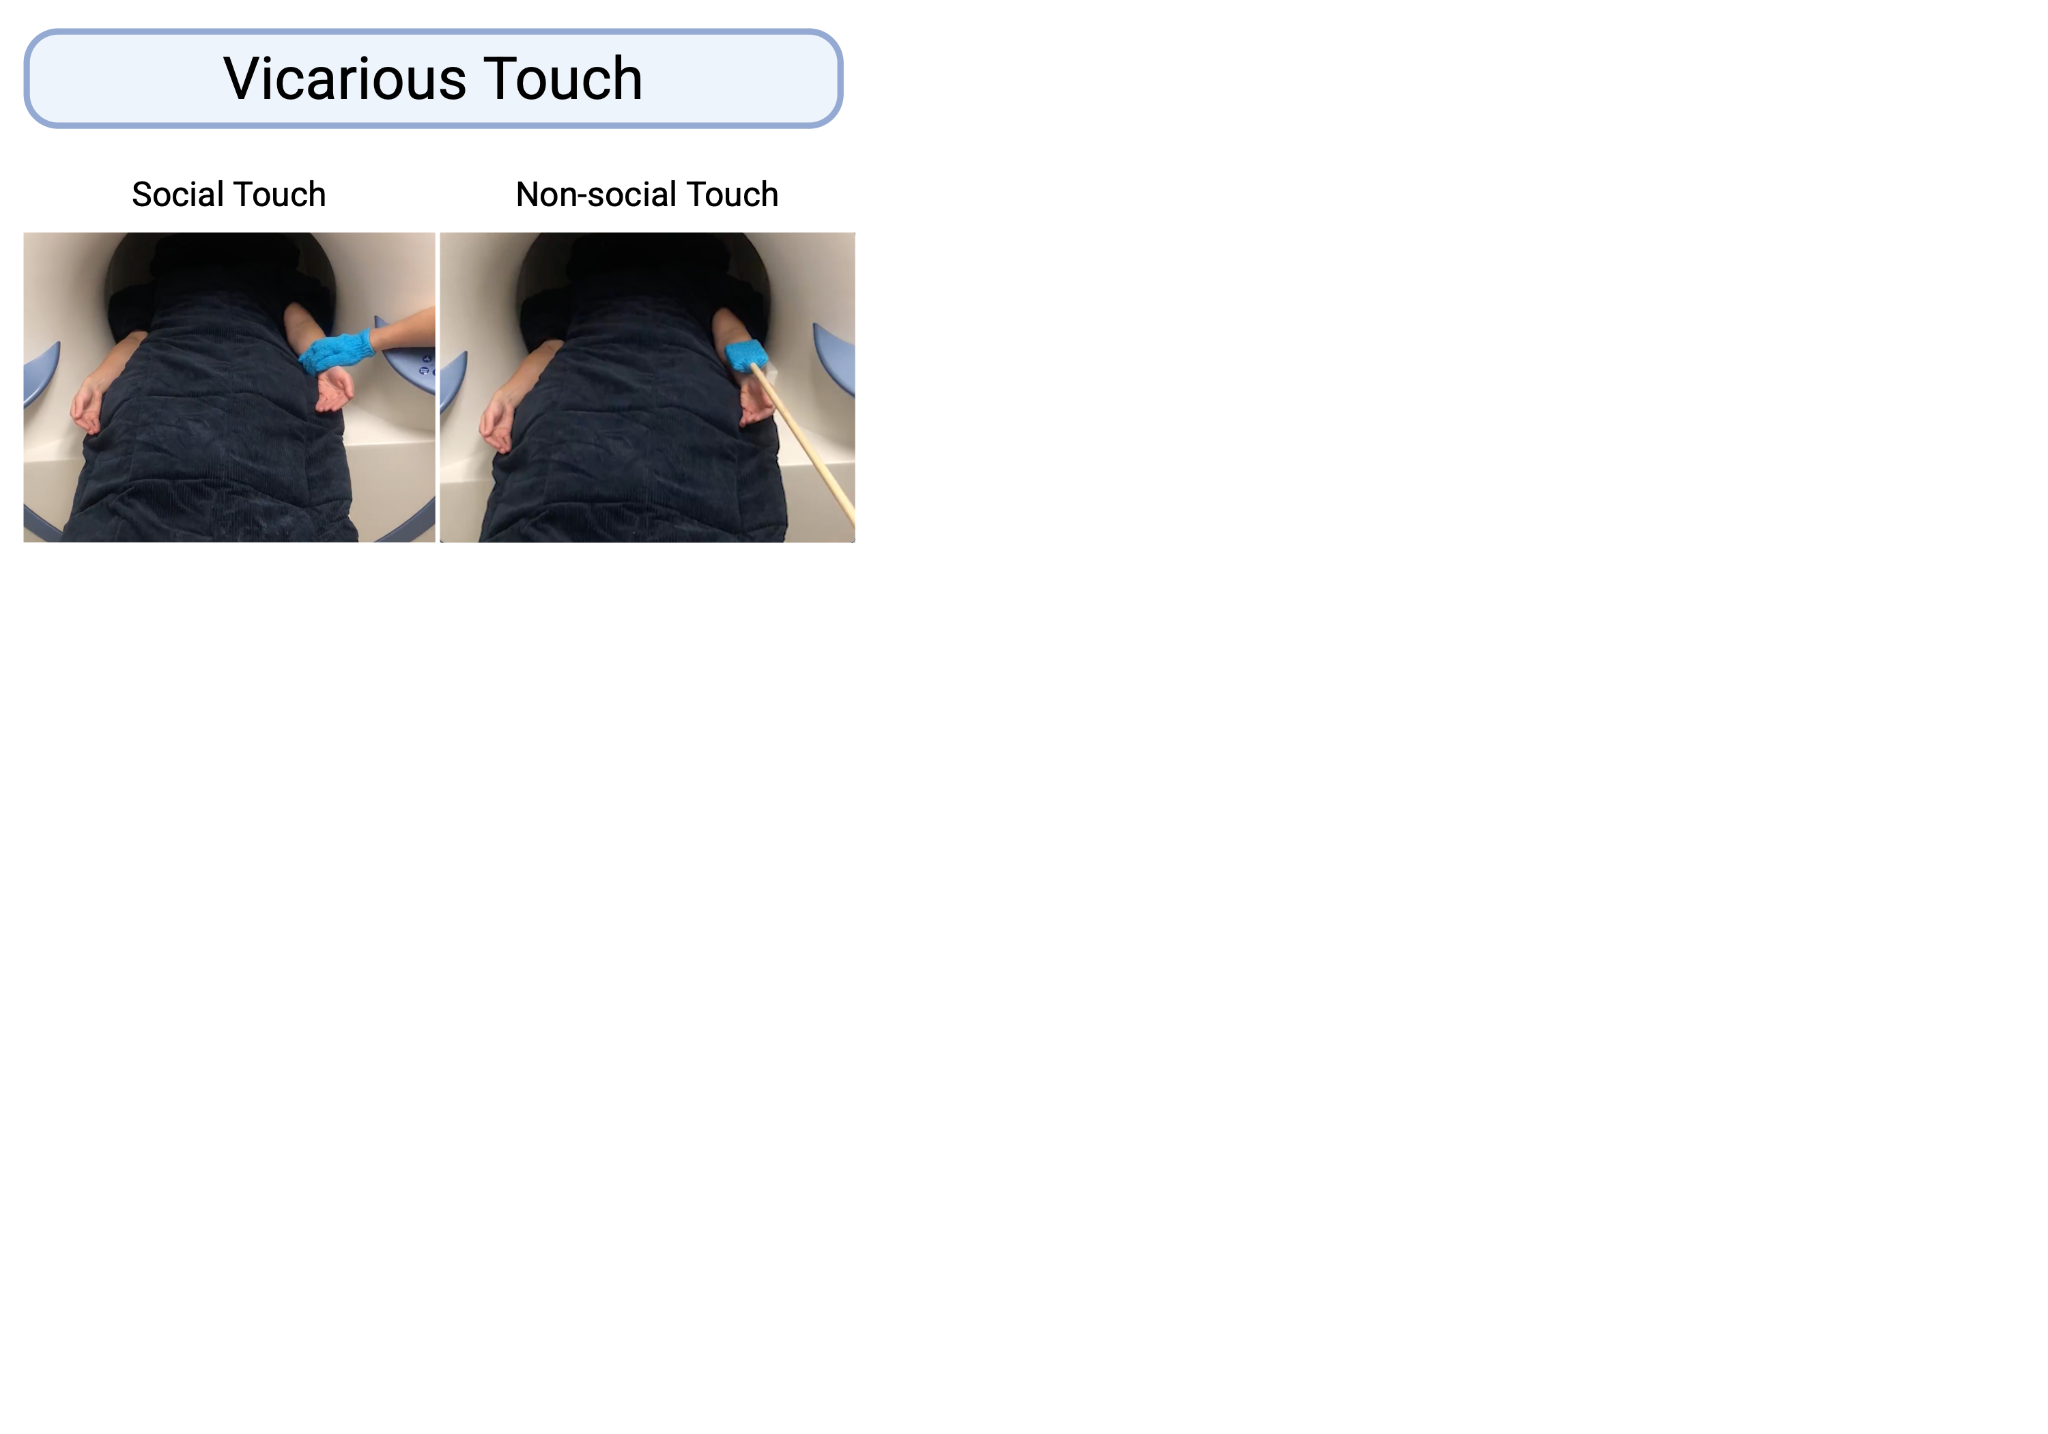


Note. Vicarious touch: watching videos of someone‘s arm being stroked by a gloved hand (social touch) or a dry sponge attached to a wooden rod (non-social touch).

**Vicarious Touch Results**

As Supplemental Table 6 shows, during observation of vicarious touch (social and non-social), significant NT>ASD differences were found in the right mid-cingulate cortex (MCC), right somatosensory cortex, and left mid and posterior insula and the anterior mid-cingulate cortex/dorsomedial prefrontal cortex (amcc/dmPFC). Neural activity in the aMCC/dmPFC while viewing non-social touch was significantly negatively correlated with abundances of *Streptococcus parasanguinis*, the genus *Ruminococcus_E* and the species *R.bromii B*, and *S.gordonii* (Supplemental Table 7). In the ASD group, restricted and repetitive behaviors (RRBs) were positively associated with activity in the right MCC while viewing non-social touch (Supplemental Table 8). OGU associations with vicarious touch ROIs in the NT group are presented in Supplemental Table 9.

**Supplemental Table 6: Group differences in neural activity for the vicarious touch task**

| Task | Condition | Contrast | Laterality | ROI | X | Y | Z | Max Z |
| --- | --- | --- | --- | --- | --- | --- | --- | --- |
| Sensory Processing (N=39) | All touch>Rest | NT>ASD | R | S1 | 32 | -26 | 48 | 3.92 |
|  |  | NT>ASD | L | PI | -42 | -16 | 13 | 2.94 |
|  |  | NT>ASD | L | MI | -38 | -7 | -6 | 2.82 |
|  |  | NT>ASD | - | aMCC/dmPFC | -2 | 44 | 34 | 3.97 |
|  |  | NT>ASD | R | MCC | 10 | -6 | 42 | 3.6 |

Note. ROI: Region of Interest; L: Left; R: Right; S1: primary somatosensory cortex; PI: posterior insula; MI: mid-insula; aMCC/dmPFC: anterior mid-cingulate cortex/dorsomedial prefrontal cortex; MCC: mid-cingulate cortex

**Supplemental Table 7: Significant OGU associations with tasked based ROIs for the vicarious touch task in ASD**

| **Vicarious Touch** | | | | | | | | |
| --- | --- | --- | --- | --- | --- | --- | --- | --- |
| Species | OGU | ROI | Stimuli | β | SE | Std β | p | q |
| Streptococcus parasanguinis | G000164675 | aMCC/dmPFC | Non-social Touch | -0.176 | 0.044 | -0.725 | 0.002 | 0.013 |
| Clostridium_AQ innocuum | G000371425 | L p Insula | Non-social Touch | 0.177 | 0.054 | 0.544 | 0.007 | 0.055 |
| Streptococcus gordonii | G000017005 | aMCC/dmPFC | Non-social Touch | -0.158 | 0.050 | -0.681 | 0.008 | 0.065 |
| Ruminococcus_E bromii_B | G003435865 | aMCC/dmPFC | Non-social Touch | -0.089 | 0.028 | -0.591 | 0.008 | 0.065 |

Note. Significance was set at FDR correct p=value (q) <0.10; ROI: Region of Interest; Std β: Standardized Beta; SE: Standardized Error, p: p-value, q= FDR adjusted p-value; aMCC/dmPFC: anterior mid-cingulate cortex/dorsomedial prefrontal cortex.

**Supplemental Table 8: Significant association between tasked based ROIs for the vicarious touch task in ASD and ADOS RRBs**

| **Vicarious Touch** | | | | | | | |
| --- | --- | --- | --- | --- | --- | --- | --- |
| ROI | Stimuli | Behavior | β | SE | Std β | p | q |
| R MCC | Non-social Touch | ADOS RRBs | 0.809 | 0.039 | 0.809 | 0.003 | 0.028 |

Note. Significance was set at FDR correct p=value (q) <0.10. ROI: Region of Interest β: unstandardized beta; SE: Standardized Error; Std β: Standardized Beta; p: p-value, q= FDR adjusted p-value.; ADOS: Autism Diagnostic Observation Schedule; RRBs: Restricted and Repetitive Behaviors.

**Supplemental Table 9: Tryptophan-related OGU associations with vicarious touch ROIs in the NT group**

| **Vicarious Touch** | | | | | | | | |
| --- | --- | --- | --- | --- | --- | --- | --- | --- |
| Species | OGUID | ROI | Stimuli | β | SE | Std β | p | q |
| Clostridium_P ventriculi | G001404895 | R MCC | Non-social touch | -0.061 | 0.013 | -0.705 | 4E-04 | 0.003 |
| Escherichia_710834 (genus) | G000778805 | aMCC/dmPFC | Social touch | 0.047 | 0.012 | 0.629 | 0.002 | 0.02 |
| Escherichia_710834 (genus) | G000781475 | aMCC/dmPFC | Social touch | 0.046 | 0.012 | 0.610 | 0.003 | 0.02 |
| Ruminococcus_C_58660 callidus | G000468015 | R MCC | Non-social touch | 0.094 | 0.025 | 0.647 | 0.003 | 0.02 |
| Escherichia_710834 (genus) | G000777575 | aMCC/dmPFC | Social touch | 0.044 | 0.012 | 0.604 | 0.003 | 0.03 |
| Escherichia_710834 (genus) | G012161415 | aMCC/dmPFC | Social touch | 0.046 | 0.013 | 0.609 | 0.004 | 0.03 |
| Bacteroides_H salyersiae | G000381365 | R MCC | Non-social touch | 0.134 | 0.038 | 0.766 | 0.004 | 0.030 |
| Klebsiella pneumoniae_718977 | G000240185 | aMCC/dmPFC | Social touch | 0.067 | 0.019 | 0.646 | 0.004 | 0.03 |
| Escherichia_710834 (genus) | G000777875 | aMCC/dmPFC | Social touch | 0.047 | 0.014 | 0.614 | 0.004 | 0.04 |
| Escherichia_710834 (genus) | G000779535 | aMCC/dmPFC | Social touch | 0.045 | 0.013 | 0.600 | 0.005 | 0.04 |
| Clostridium_AQ innocuum | G001406695 | R S1 | Social touch | -0.146 | 0.052 | -0.429 | 0.015 | 0.04 |
| Clostridium_AQ innocuum | G001406695 | L Mid-Insula | Social touch | -0.144 | 0.049 | -0.634 | 0.011 | 0.04 |
| Clostridium_AQ innocuum | G001406695 | aMCC/dmPFC | Social touch | -0.184 | 0.062 | -0.509 | 0.01 | 0.04 |
| Shigella sonnei | G007998125 | aMCC/dmPFC | Social touch | 0.043 | 0.013 | 0.577 | 0.006 | 0.05 |
| Escherichia ruysiae | G000026345 | aMCC/dmPFC | Social touch | 0.041 | 0.013 | 0.570 | 0.006 | 0.05 |
| Escherichia marmotae | G000012005 | aMCC/dmPFC | Social touch | 0.042 | 0.013 | 0.571 | 0.007 | 0.05 |
| Escherichia_710834 (genus) | G012357415 | aMCC/dmPFC | Social touch | 0.041 | 0.013 | 0.565 | 0.007 | 0.06 |
| Escherichia albertii | G001283625 | aMCC/dmPFC | Social touch | 0.042 | 0.013 | 0.569 | 0.007 | 0.06 |
| Streptococcus mitis_AR_353295 | G000027165 | L p Insula | Non-social touch | 0.161 | 0.051 | 0.668 | 0.008 | 0.06 |
| Escherichia coli | G000008865 | aMCC/dmPFC | Social touch | 0.041 | 0.013 | 0.558 | 0.008 | 0.07 |
| Escherichia coli | G000299455 | aMCC/dmPFC | Social touch | 0.041 | 0.013 | 0.556 | 0.008 | 0.07 |
| Escherichia albertii | G000944855 | aMCC/dmPFC | Social touch | 0.042 | 0.013 | 0.559 | 0.009 | 0.07 |
| Streptococcus oralis_E_351036 | G000344275 | L p Insula | Non-social touch | 0.136 | 0.044 | 0.655 | 0.009 | 0.07 |
| Ruminococcus_D bicirculans | G000723465 | R MCC | Non-social touch | 0.081 | 0.026 | 0.631 | 0.009 | 0.070 |
| Shigella boydii | G000006925 | aMCC/dmPFC | Social touch | 0.041 | 0.013 | 0.548 | 0.01 | 0.08 |
| Blautia_A_141781 avistercoris | G002159835 | R MCC | Non-social touch | 0.263 | 0.088 | 0.564 | 0.01 | 0.08 |
| Escherichia_710834 (genus) | G008273775 | aMCC/dmPFC | Social touch | 0.041 | 0.014 | 0.545 | 0.01 | 0.08 |
| Escherichia ruysiae | G000026325 | aMCC/dmPFC | Social touch | 0.040 | 0.013 | 0.541 | 0.011 | 0.09 |
| Escherichia_710834 (genus) | G900227605 | aMCC/dmPFC | Social touch | 0.059 | 0.020 | 0.566 | 0.012 | 0.0999 |

Note. OGU: Operational Genomic Unit; ROI: Region of Interest; β: unstandardized beta; SE: Standardized Error; Std β: Standardized Beta; p: p-value, q= FDR adjusted p-value; L: Left; R: Right; MCC: mid-cingulate cortex ;aMCC/dmPFC: anterior mid-cingulate cortex/dorsomedial prefrontal cortex; S1: primary somatosensory cortex; p: posterior

**References**

1. Wechsler D. Wechsler Abbreviated Scale of Intelligence- Second Edition. Published online 2011.

2. Crovitz HF, Zener K. A group-test for assessing hand-and eye-dominance. Am J Psychol. 1962;75(2):271-276.

3. Lord C, Rutter M, DiLavore PC, Risi S, Gotham K, Bishop S. Autism Diagnostic Observation Schedule, Second Edition. Western Psychological Services; 2012.

4. Lord C, Rutter M, Le Couteur A. Autism Diagnostic Interview-Revised: a revised version of a diagnostic interview for caregivers of individuals with possible pervasive developmental disorders. J Autism Dev Disord. 1994;24(5):659-685. doi:10.1007/bf02172145

5. Conners CK. Conners third edition (Conners 3). Los Angeles, CA: Western Psychological Services. Published online 2008.

6. Constantino JN, Gruber CP. Social Responsiveness Scale: SRS-2. Western psychological services Torrance, CA; 2012.

7. Marotz C, Amir A, Humphrey G, Gaffney J, Gogul G, Knight R. DNA extraction for streamlined metagenomics of diverse environmental samples. Biotechniques. 2017;62(6):290-293. doi:10.2144/000114559

8. Gonzalez A, Navas-Molina JA, Kosciolek T, et al. Qiita: rapid, web-enabled microbiome meta-analysis. Nat Methods. 2018;15(10):796-798. doi:10.1038/s41592-018-0141-9

9. Guccione C, Patel L, Tomofuji Y, et al. Incomplete human reference genomes can drive false sex biases and expose patient-identifying information in metagenomic data. Nat Commun. 2025;16(1):825. doi:10.1038/s41467-025-56077-5

10. Chen S, Zhou Y, Chen Y, Gu J. fastp: an ultra-fast all-in-one FASTQ preprocessor. Bioinformatics. 2018;34(17):i884-i890. doi:10.1093/bioinformatics/bty560

11. Li H. Minimap2: pairwise alignment for nucleotide sequences. Bioinformatics. 2018;34(18):3094-3100. doi:10.1093/bioinformatics/bty191

12. Liao WW, Asri M, Ebler J, et al. A Draft Human Pangenome Reference. bioRxiv. Published online July 9, 2022. doi:10.1101/2022.07.09.499321

13. Zakeri M, Brown NK, Ahmed OY, Gagie T, Langmead B. Movi: a fast and cache-efficient full-text pangenome index. bioRxivorg. Published online February 15, 2024. doi:10.1101/2023.11.04.565615

14. Zhu Q, Huang S, Gonzalez A, et al. Phylogeny-aware analysis of metagenome community ecology based on matched reference genomes while bypassing taxonomy. mSystems. 2022;7(2):e0016722. doi:10.1128/msystems.00167-22

15. Langmead B, Salzberg SL. Fast gapped-read alignment with Bowtie 2. Nat Methods. 2012;9(4):357-359. doi:10.1038/nmeth.1923

16. Hillmann B, Al-Ghalith GA, Shields-Cutler RR, Zhu Q, Knight R, Knights D. SHOGUN: a modular, accurate and scalable framework for microbiome quantification. Bioinformatics. 2020;36(13):4088-4090. doi:10.1093/bioinformatics/btaa277

17. McDonald D, Clemente JC, Kuczynski J, et al. The Biological Observation Matrix (BIOM) format or: how I learned to stop worrying and love the ome-ome. Gigascience. 2012;1(1):7. doi:10.1186/2047-217X-1-7

18. McDonald D, Jiang Y, Balaban M, et al. Greengenes2 unifies microbial data in a single reference tree. Nat Biotechnol. 2024;42(5):715-718. doi:10.1038/s41587-023-01845-1

19. Tottenham N, Tanaka JW, Leon AC, et al. The NimStim set of facial expressions: Judgments from untrained research participants. Psychiatry Res. 2009;168(3):242-249. doi:10.1016/j.psychres.2008.05.006

20. Harris PA, Taylor R, Thielke R, Payne J, Gonzalez N, Conde JG. Research electronic data capture (REDCap)--a metadata-driven methodology and workflow process for providing translational research informatics support. J Biomed Inform. 2009;42(2):377-381. doi:10.1016/j.jbi.2008.08.010

21. Harris PA, Taylor R, Minor BL, et al. The REDCap consortium: Building an international community of software platform partners. J Biomed Inform. 2019;95(103208):103208. doi:10.1016/j.jbi.2019.103208

22. Hus V, Lord C. The autism diagnostic observation schedule, module 4: revised algorithm and standardized severity scores. J Autism Dev Disord. 2014;44(8):1996-2012. doi:10.1007/s10803-014-2080-3

23. LeBourgeois MK, Giannotti F, Cortesi F, Wolfson AR, Harsh J. The Relationship Between Reported Sleep Quality and Sleep Hygiene in Italian and American Adolescents. Pediatrics. 2005;115(Supplement 1):257-265. doi:10.1542/peds.2004-0815H

24. Essner B, Noel M, Myrvik M, Palermo T. Examination of the Factor Structure of the Adolescent Sleep-Wake Scale (ASWS). Behav Sleep Med. 2015;13(4):296-307. doi:10.1080/15402002.2014.896253

25. Rieffe C, Oosterveld P, Terwogt MM. An alexithymia questionnaire for children: Factorial and concurrent validation results. Pers Individ Dif. 2006;40(1):123-133. doi:10.1016/j.paid.2005.05.013

26. Butera CD, Harrison L, Kilroy E, et al. Relationships between alexithymia, interoception, and emotional empathy in autism spectrum disorder. Autism. 2023;27(3):690-703. doi:10.1177/13623613221111310

27. Loas G, Braun S, Delhaye M, Linkowski P. The measurement of alexithymia in children and adolescents: Psychometric properties of the Alexithymia Questionnaire for Children and the twenty-item Toronto Alexithymia Scale in different non-clinical and clinical samples of children and adolescents. PLoS One. 2017;12(5):e0177982. doi:10.1371/journal.pone.0177982

28. Shim JS, Oh K, Kim HC. Dietary assessment methods in epidemiologic studies. Epidemiol Health. 2014;36:e2014009-e2014009. doi:10.4178/epih/e2014009

29. Fergus TA, Valentiner DP. The Disgust Propensity and Sensitivity Scale–Revised: An examination of a reduced-item version. J Anxiety Disord. 2009;23(5):703-710. doi:10.1016/j.janxdis.2009.02.009

30. van Overveld WJM, de Jong PJ, Peters ML, Cavanagh K, Davey GCL. Disgust propensity and disgust sensitivity: Separate constructs that are differentially related to specific fears. Pers Individ Dif. 2006;41(7):1241-1252. doi:10.1016/j.paid.2006.04.021

31. Svedlund J, Sjödin I, Dotevall G. GSRS--a clinical rating scale for gastrointestinal symptoms in patients with irritable bowel syndrome and peptic ulcer disease. Dig Dis Sci. 1988;33(2):129-134. doi:10.1007/bf01535722

32. Karagozlu S, Dalgic B, Iseri E. The Relationship of Severity of Autism with Gastrointestinal Symptoms and Serum Zonulin Levels in Autistic Children. J Autism Dev Disord. 2022;52(2):623-629. doi:10.1007/s10803-021-04966-1

33. Kang DW, Adams JB, Coleman DM, Pollard EL. Long-term benefit of Microbiota Transfer Therapy on autism symptoms and gut microbiota. Sci Rep. Published online 2019. https://www.nature.com/articles/s41598-019-42183-0https://www.nature.com/articles/s41598-019-42183-0

34. Birmaher B, Brent DA, Chiappetta L, Bridge J, Monga S, Baugher M. Psychometric Properties of the Screen for Child Anxiety Related Emotional Disorders (SCARED): A Replication Study. J Am Acad Child Adolesc Psychiatry. 1999;38(10):1230-1236. doi:10.1097/00004583-199910000-00011

35. Behrens B, Swetlitz C, Pine DS, Pagliaccio D. The Screen for Child Anxiety Related Emotional Disorders (SCARED): Informant Discrepancy, Measurement Invariance, and Test–Retest Reliability. Child Psychiatry Hum Dev. 2019;50(3):473-482. doi:10.1007/s10578-018-0854-0

36. Baranek GT. Sensory Experiences Questionnaire (Version 3.0, Unpublished Manuscript). Published online 2009.

37. Ausderau K, Sideris J, Furlong M, Little LM, Bulluck J, Baranek GT. National Survey of Sensory Features in Children with ASD: Factor Structure of the Sensory Experience Questionnaire (3.0). J Autism Dev Disord. 2014;44(4):915-925. doi:10.1007/s10803-013-1945-1

38. Green SA, Hernandez LM, Bowman HC, Bookheimer SY, Dapretto M. Sensory over-responsivity and social cognition in ASD: Effects of aversive sensory stimuli and attentional modulation on neural responses to social cues. Dev Cogn Neurosci. 2018;29:127-139. doi:10.1016/j.dcn.2017.02.005

39. Chernikova MA, Flores GD, Kilroy E, Labus JS, Mayer EA, Aziz-Zadeh L. The brain-gut-microbiome system: Pathways and implications for autism spectrum disorder. Nutrients. 2021;13(12):4497. doi:10.3390/nu13124497
